# Supplementary material for: Rational selection of Fe2V4O13 over FeVO4 as a preferred active site on Sb-promoted TiO2 for catalytic NOX reduction with NH3
Source: Royal Society of Chemistry journal article supplement (doi:10.1039/c8cy01304g), 2018-01-01
Supplement: c8cy01304g1.pdf [file c8cy01304g1.pdf]

**Supplementary information**

**Title:** Rational Selection of  $\text{Fe}_2\text{V}_4\text{O}_{13}$  over  $\text{FeVO}_4$  as a Preferred Active Site on Sb-Promoted  $\text{TiO}_2$  for Catalytic  $\text{NO}_x$  Reduction with  $\text{NH}_3$

**Author(s):** Jongsik Kim,\* Dong Ho Kim, Dong Wook Kwon, and Heon Phil Ha\*

**Table of Contents**

***Table S1*** .....S2

***Fig. S1-S7*** .....S3-S9

**Table S1** Locations and relative abundance of surface Fe, V, and O species for Fe<sub>1</sub>/TiO<sub>2</sub> and Fe<sub>2</sub>/TiO<sub>2</sub>. Values with *italic* indicate location of surface species (eV), whereas values in parentheses indicate relative abundance of surface species (mol. %).

|                                   | Fe 2p <sub>3/2</sub>          |                               | V 2p <sub>3/2</sub>          |                              | O 1s                         |                             |                             |
|-----------------------------------|-------------------------------|-------------------------------|------------------------------|------------------------------|------------------------------|-----------------------------|-----------------------------|
|                                   | Fe <sup>3+</sup> <sup>a</sup> | Fe <sup>δ+</sup> <sup>a</sup> | V <sup>5+</sup> <sup>a</sup> | V <sup>4+</sup> <sup>a</sup> | O' <sub>α</sub> <sup>a</sup> | O <sub>α</sub> <sup>a</sup> | O <sub>β</sub> <sup>a</sup> |
| Fe <sub>1</sub> /TiO <sub>2</sub> | <i>710.9</i><br>(49.7)        | <i>713.3</i><br>(50.3)        | <i>517.3</i><br>(73.1)       | <i>516.2</i><br>(26.9)       | <i>532.6</i><br>(5.0)        | <i>531.2</i><br>(12.6)      | <i>530.0</i><br>(82.4)      |
| Fe <sub>2</sub> /TiO <sub>2</sub> | <i>711.4</i><br>(42.2)        | <i>713.7</i><br>(57.8)        | <i>517.1</i><br>(68.6)       | <i>516.0</i><br>(31.4)       | <i>532.6</i><br>(0.1)        | <i>531.0</i><br>(20.0)      | <i>530.0</i><br>(79.9)      |

<sup>a</sup> via deconvolution of XP spectra.

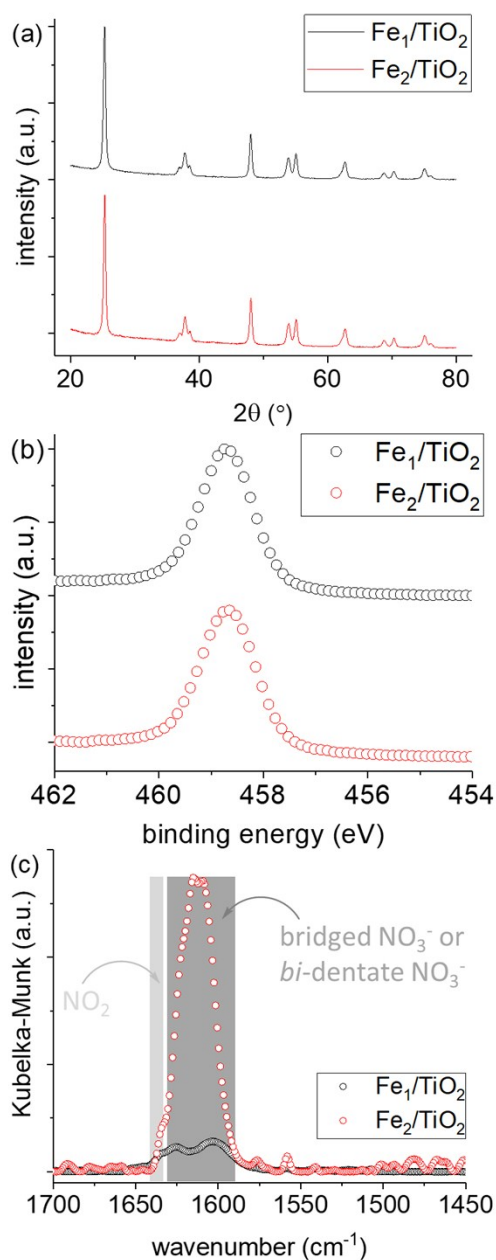

**Fig. S1** (a) XRD patterns of  $\text{Fe}_x/\text{TiO}_2$  catalysts. (b) XP spectra of  $\text{Fe}_x/\text{TiO}_2$  catalysts in  $\text{Ti } 2p_{3/2}$  regime. (c) Background-subtracted *in situ* DRIFT spectra of  $\text{Fe}_x/\text{TiO}_2$  catalysts after saturating the surfaces with  $\text{NO}$  (1000 ppm) and  $\text{O}_2$  (3 vol. %) at 220 °C for 30 minutes. Prior to DRIFT runs, the surfaces are initially purged with  $\text{O}_2$  and  $\text{N}_2$  at 400 °C for an hour. Grey-shaded regimes are assigned to N-O vibrations of multiple  $\text{NO}/\text{O}_2$ -driven species chemisorbed on the surfaces.

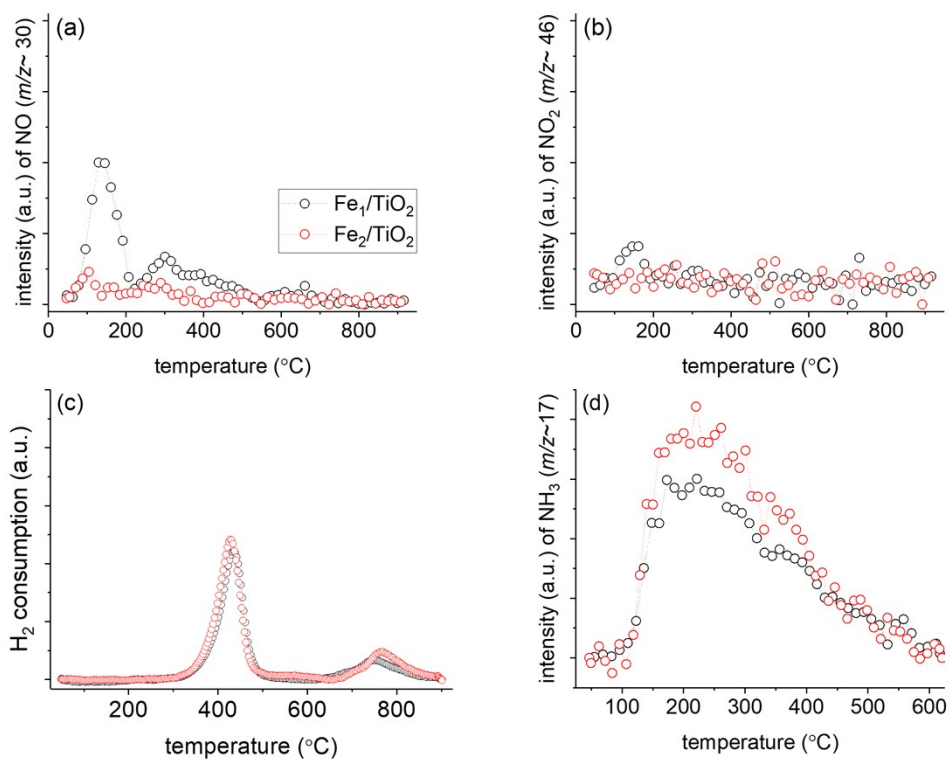

**Fig. S2** Profiles of NO-TPD (a for NO desorbed; b for NO<sub>2</sub> evolved), H<sub>2</sub>-TPR (c), and NH<sub>3</sub>-TPD (d) for Fe<sub>x</sub>/TiO<sub>2</sub> catalysts.

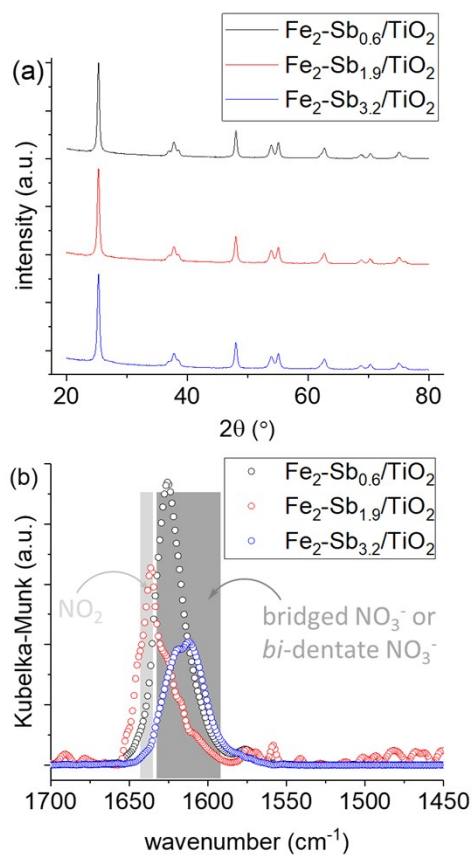

**Fig. S3** (a) XRD patterns of  $\text{Fe}_2\text{-Sb}_y/\text{TiO}_2$  catalysts. (b) Background-subtracted *in situ* DRIFT spectra of  $\text{Fe}_2\text{-Sb}_y/\text{TiO}_2$  catalysts after saturating the surfaces with  $\text{NO}$  (1000 ppm) and  $\text{O}_2$  (3 vol. %) at 220 °C for 30 minutes. Prior to DRIFT runs, the surfaces are initially purged with  $\text{O}_2$  and  $\text{N}_2$  at 400 °C for an hour. Grey-shaded regimes are assigned to N-O vibrations of multiple  $\text{NO}/\text{O}_2$ -driven species chemisorbed on the surfaces.

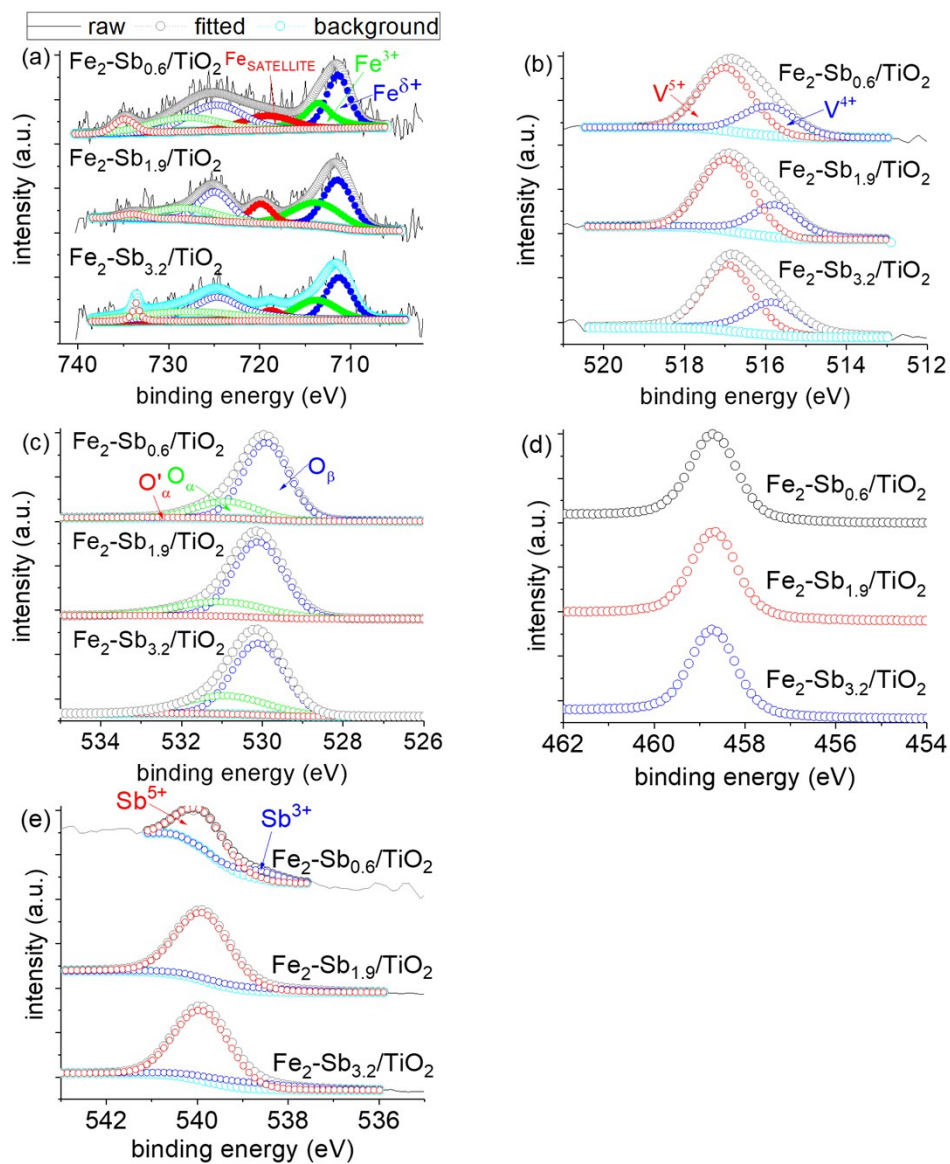

**Fig. S4** XP spectra of  $\text{Fe}_2\text{-Sb}_V/\text{TiO}_2$  catalysts in (a) Fe 2p, (b) V 2p<sub>3/2</sub>, (c) O 1s, (d) Ti 2p<sub>3/2</sub>, and (e) Sb 3d<sub>3/2</sub> regimes. In (a), solid and empty symbols indicate surface Fe species in Fe 2p<sub>3/2</sub> and Fe 2p<sub>1/2</sub> regimes, respectively.

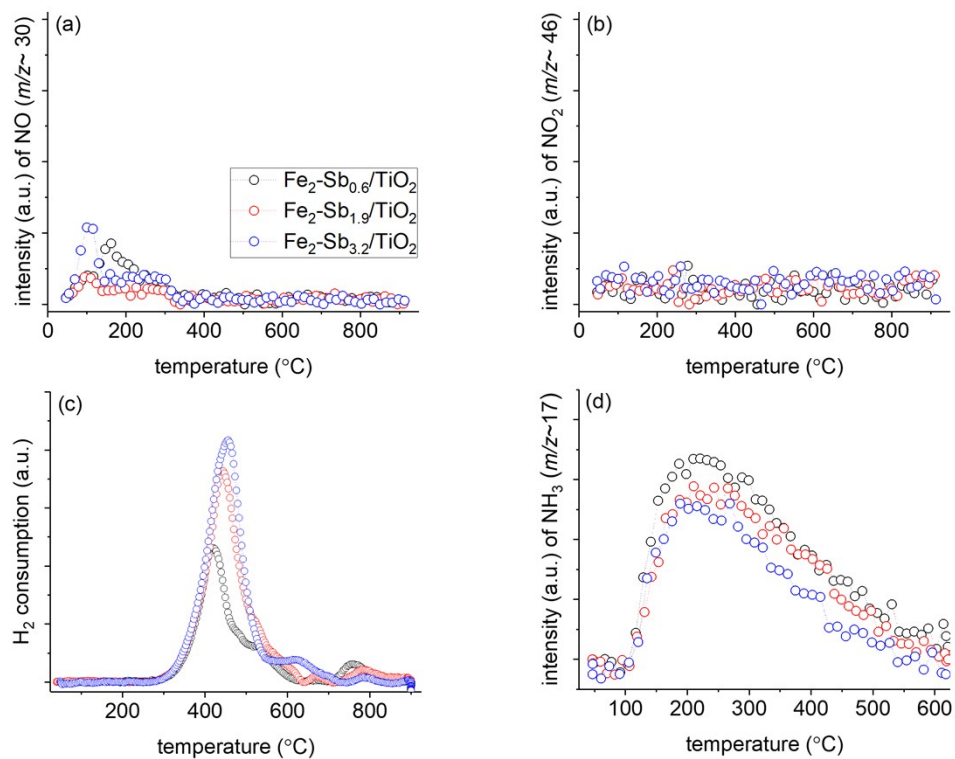

**Fig. S5** Profiles of NO-TPD (a for NO desorbed; b for NO<sub>2</sub> evolved), H<sub>2</sub>-TPR (c), and NH<sub>3</sub>-TPD (d) for Fe<sub>2</sub>-Sb<sub>v</sub>/TiO<sub>2</sub> catalysts.

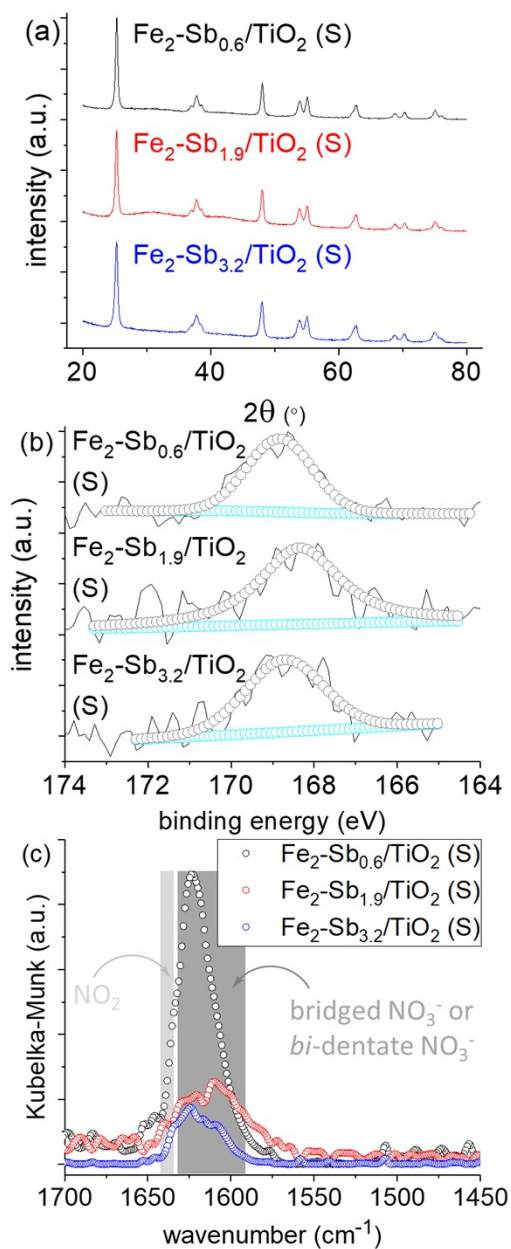

**Fig. S6** (a) XRD patterns of Fe<sub>2</sub>-Sb<sub>V</sub>/TiO<sub>2</sub> (S) catalysts. (b) XP spectra of Fe<sub>2</sub>-Sb<sub>V</sub>/TiO<sub>2</sub> (S) catalysts in S 2p regime. (c) Background-subtracted *in situ* DRIFT spectra of Fe<sub>2</sub>-Sb<sub>V</sub>/TiO<sub>2</sub> (S) catalysts after saturating the surfaces with NO (1000 ppm) and O<sub>2</sub> (3 vol. %) at 220 °C for 30 minutes. Prior to DRIFT runs, the surfaces are initially purged with O<sub>2</sub> and N<sub>2</sub> at 400 °C for an hour. Grey-shaded regimes are assigned to N-O vibrations of multiple NO/O<sub>2</sub>-driven species chemisorbed on the surfaces.



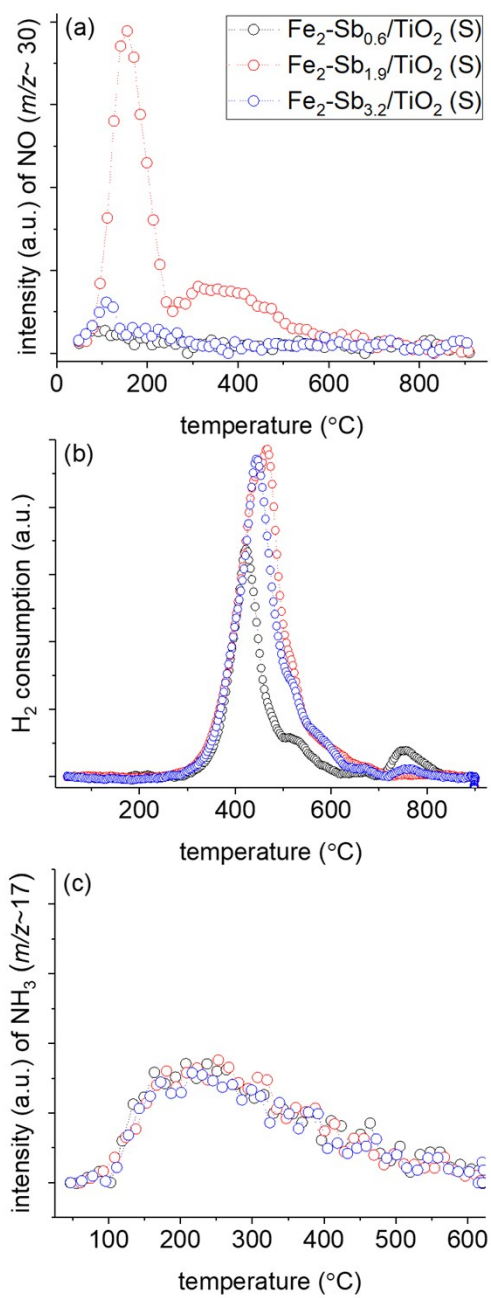

**Fig. S7** Profiles of NO-TPD (a for NO desorbed),  $\text{H}_2$ -TPR (b), and  $\text{NH}_3$ -TPD (c) for  $\text{Fe}_2\text{-Sb}_\gamma/\text{TiO}_2$  (S) catalysts.
